# Supplementary material
Source: PubMed Central journal article supplement (PMC10492096)
Supplement: ajcr0013-3721-f8.pdf [file ajcr0013-3721-f8.pdf]

## ARAP3 regulates the tumor microenvironment of Ewing sarcoma

**Table S1.** Primer sequences used in this study

| Gene                | Forward primer (5'→3')  | Reverse primer (5'→3')  |
|---------------------|-------------------------|-------------------------|
| Human <i>ARAP3</i>  | AGTATGCAGACACGTTCCGAC   | AGGCGTAGAATGCGTTTCCG    |
| Human <i>TP53</i>   | CAGCACATGACGGAGGTTGT    | TCATCCAATACTCCACACGC    |
| Human <i>CDKN1A</i> | CGATGGAACCTCGACTTTGTCA  | GCACAAGGGTACAAGACAGTG   |
| Human <i>BAX</i>    | CCCGAGAGGTCTTTTCCGAG    | CCAGCCCATGATGGTTCTGAT   |
| Human <i>MDM2</i>   | GAATCATCGGACTCAGGTACATC | TCTGTCTACTAATTGCTCTCCT  |
| Human <i>GAPDH</i>  | CTGGGCTACACTGAGCACCC    | AAGTGGTCGTTGAGGGCAATG   |
| Human <i>IL1B</i>   | GGACAGGATATGGAGCAACAAG  | TTC AACACGCAGGACAGGTA   |
| Human <i>IL11</i>   | ACTGCTGCTGCTGAAGACTC    | CCACCCCTGCTCCTGAAATA    |
| Mouse <i>Top2a</i>  | ATGGCTATGGAGCTAAACTGTGT | CTTTGTCCAGGCTTTGCATTTT  |
| Mouse <i>Acp5</i>   | CACTCCCACCCTGAGATTTGT   | CATCGTCTGCACGGTTCTG     |
| Mouse <i>Nfatc1</i> | GACCCGGAGTTTCGACTTCG    | TGACACTAGGGGACACATAACTG |
| Mouse <i>Gapdh</i>  | TGGCCTCCGTGTTCTAC       | GAGTTGCTGTTGAAGTCGCA    |



# ARAP3 regulates the tumor microenvironment of Ewing sarcoma

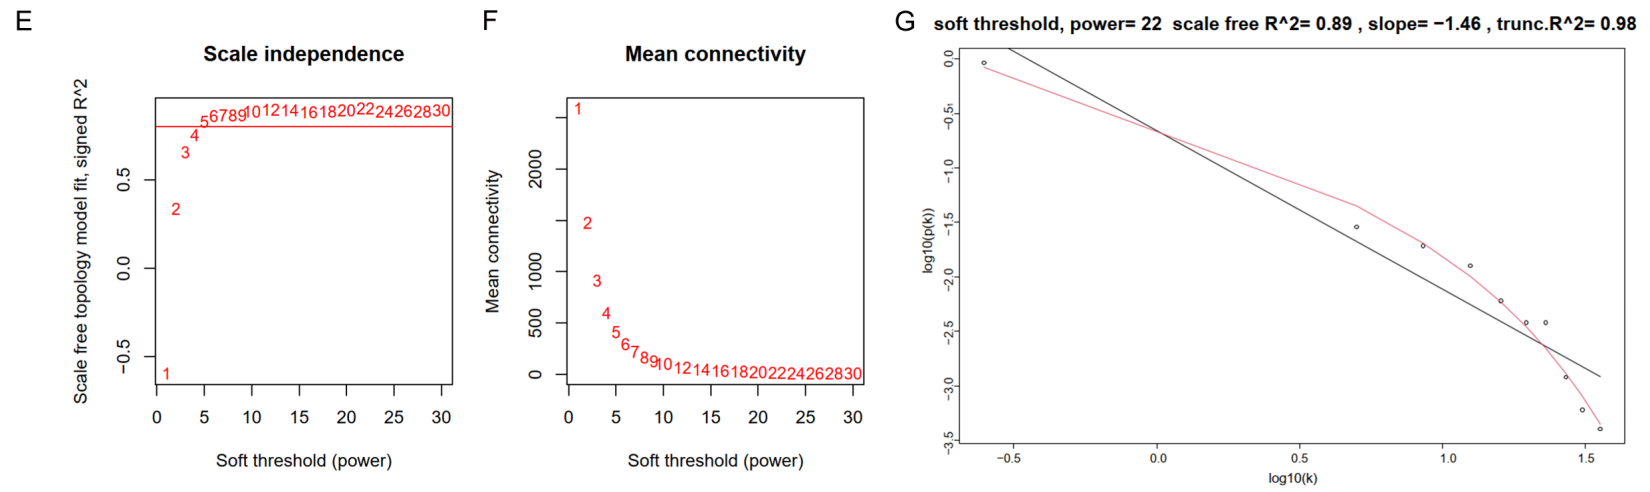

**Figure S1.** Correction of batch effects and determination of soft threshold.

# ARAP3 regulates the tumor microenvironment of Ewing sarcoma

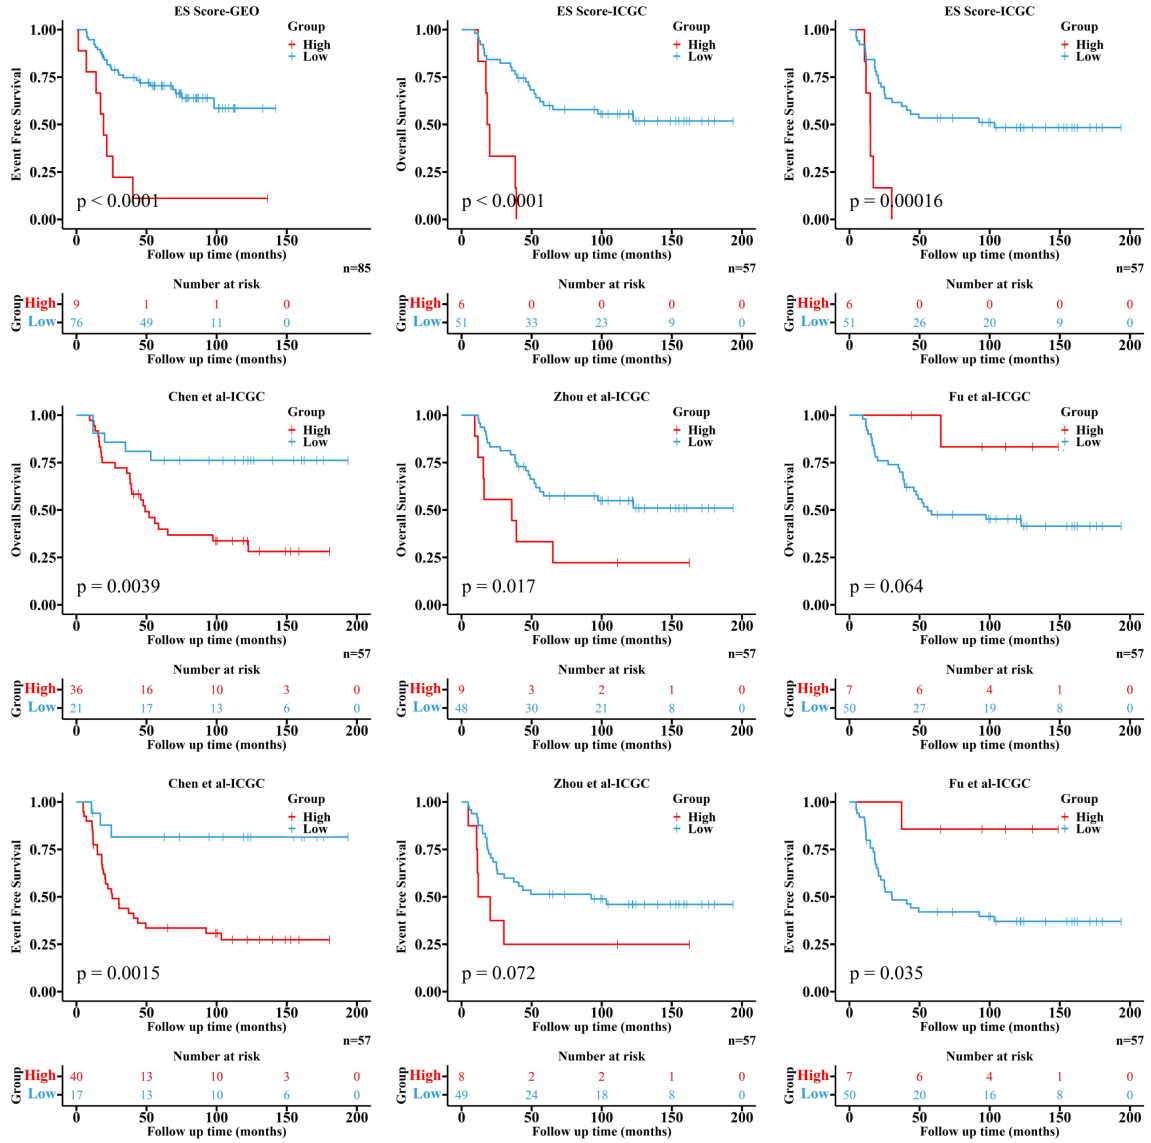

Figure S2. Kaplan-Meier curves for OS and EFS of ES Score and other published models.



# ARAP3 regulates the tumor microenvironment of Ewing sarcoma

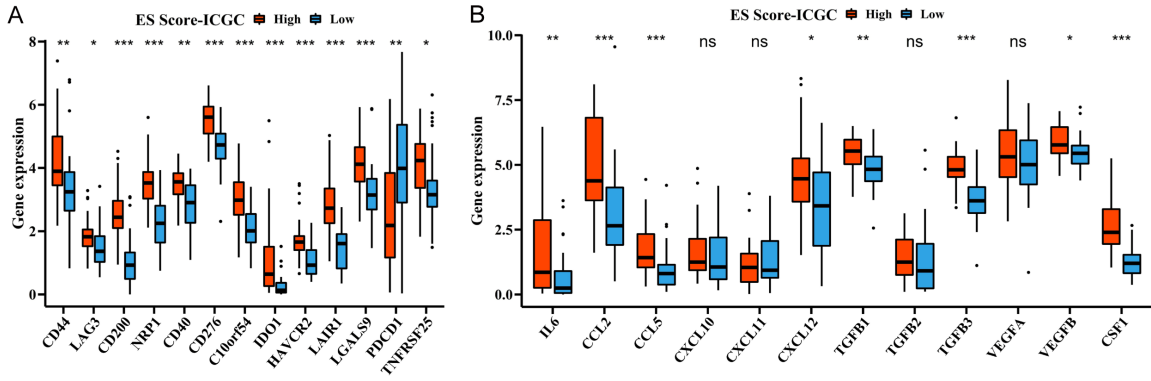

Figure S3. Expression of checkpoints and cytokines of high- and low-ES Score groups in ICGC cohort.

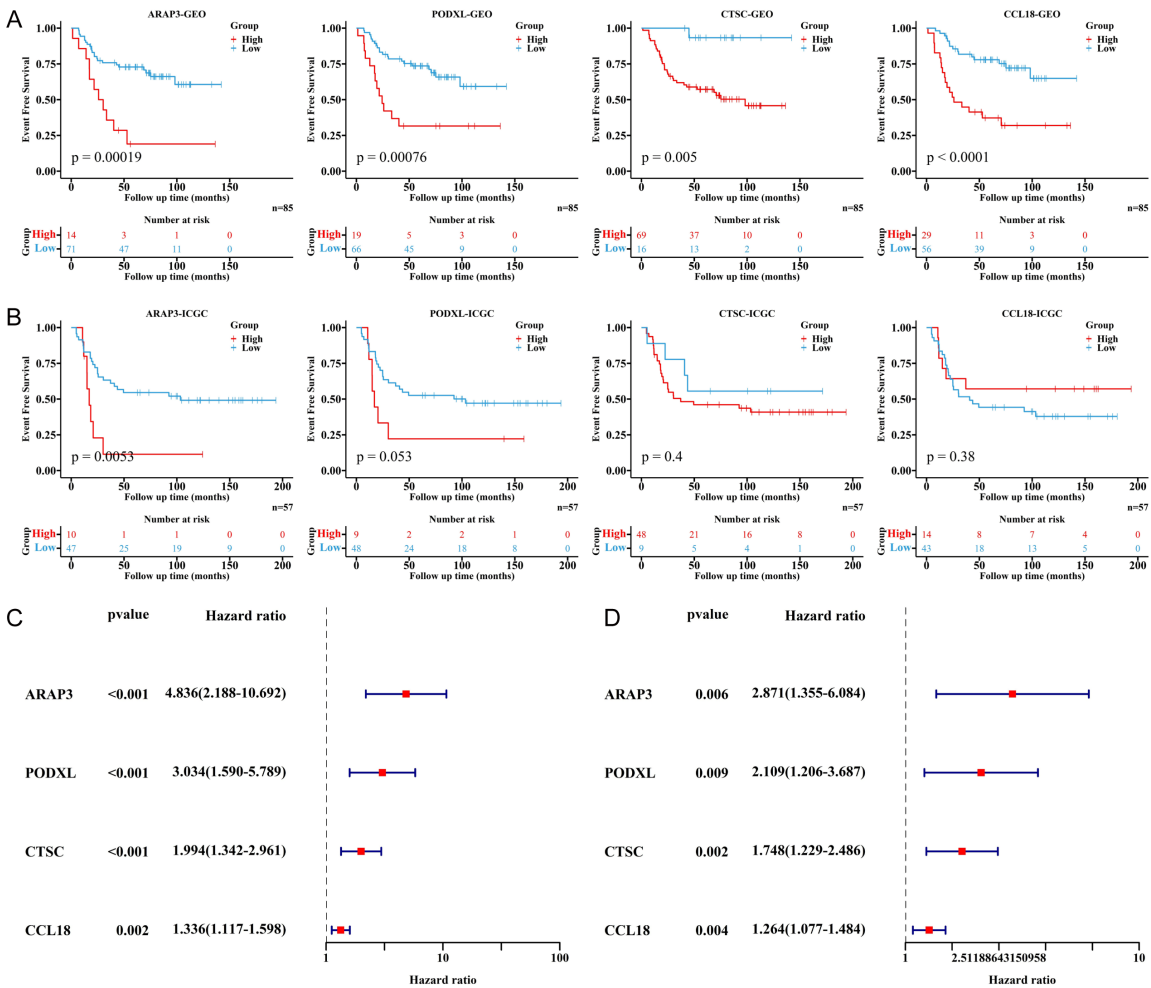

Figure S4. Survival analysis of ARAP3, PODXL, CTSC and CCL18.

# ARAP3 regulates the tumor microenvironment of Ewing sarcoma

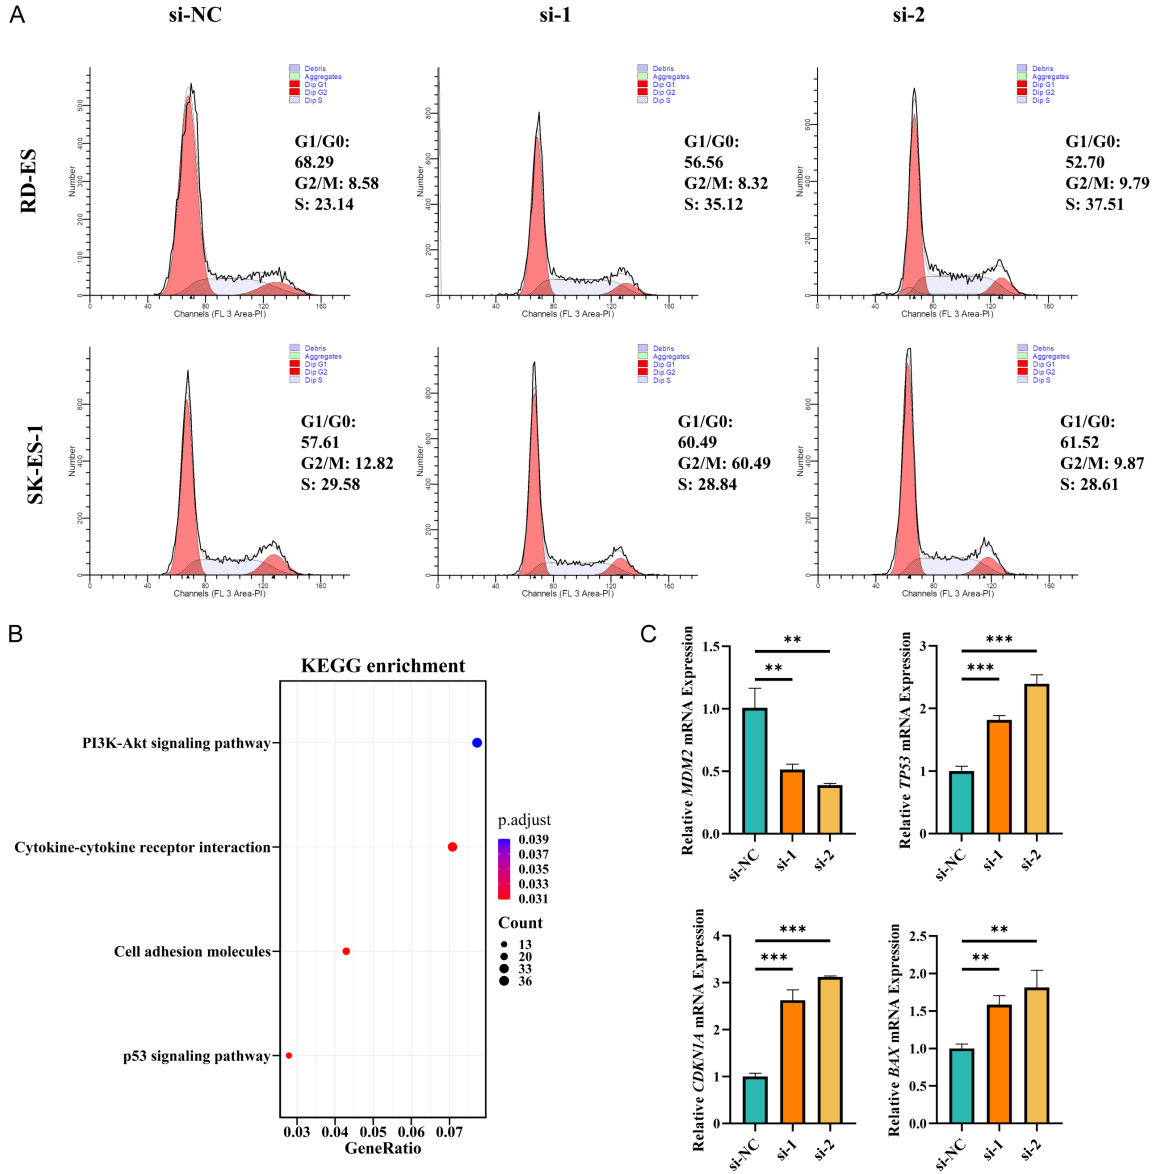

Figure S5. P53 signaling pathway may regulate the malignant behavior of ARAP3 knockdown ES cells.

# ARAP3 regulates the tumor microenvironment of Ewing sarcoma

A

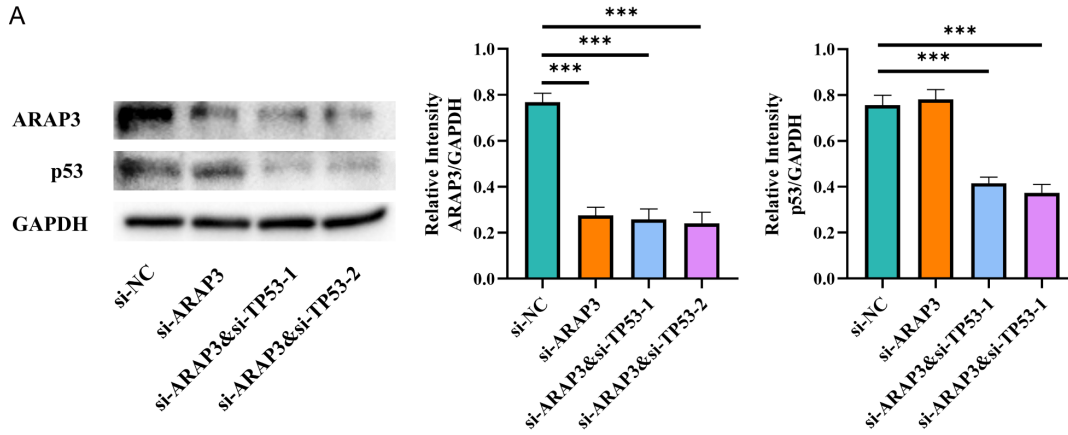

B

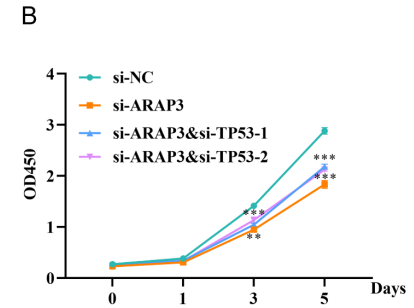

C

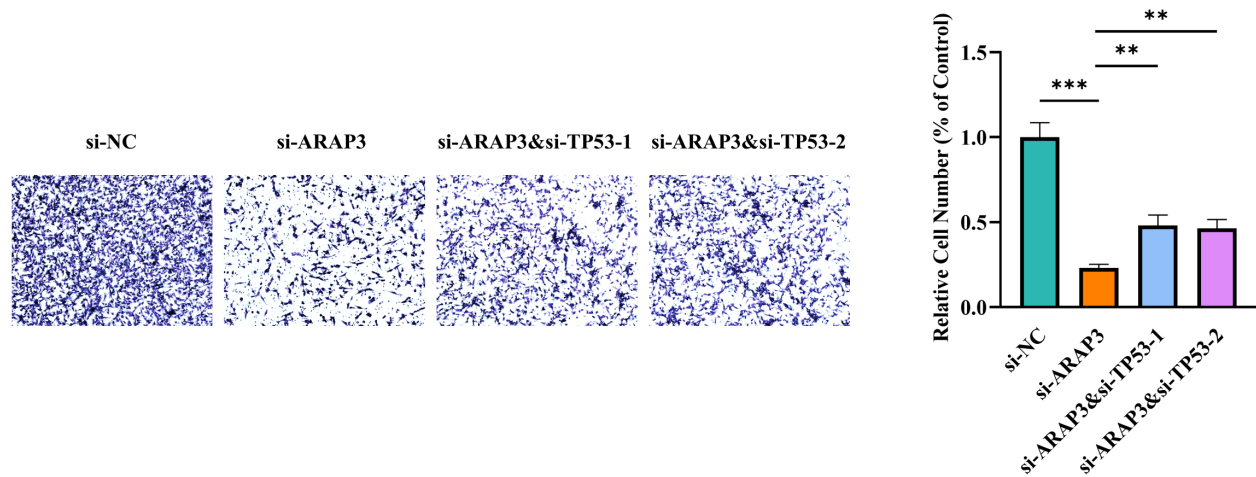

D

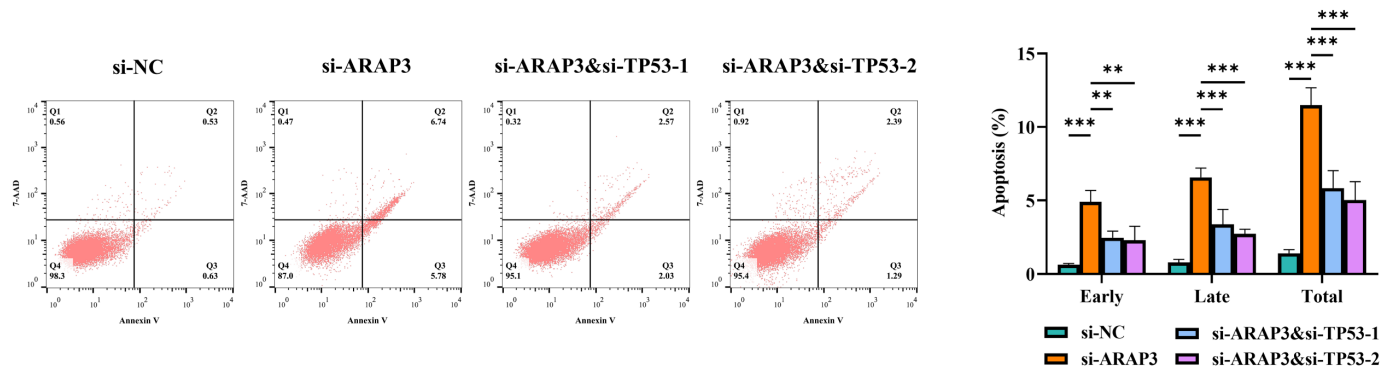

# ARAP3 regulates the tumor microenvironment of Ewing sarcoma

Figure S6. The ability of proliferation, migration, and apoptosis of ES cells co-transfected with si-ARAP3 and si-TP53.

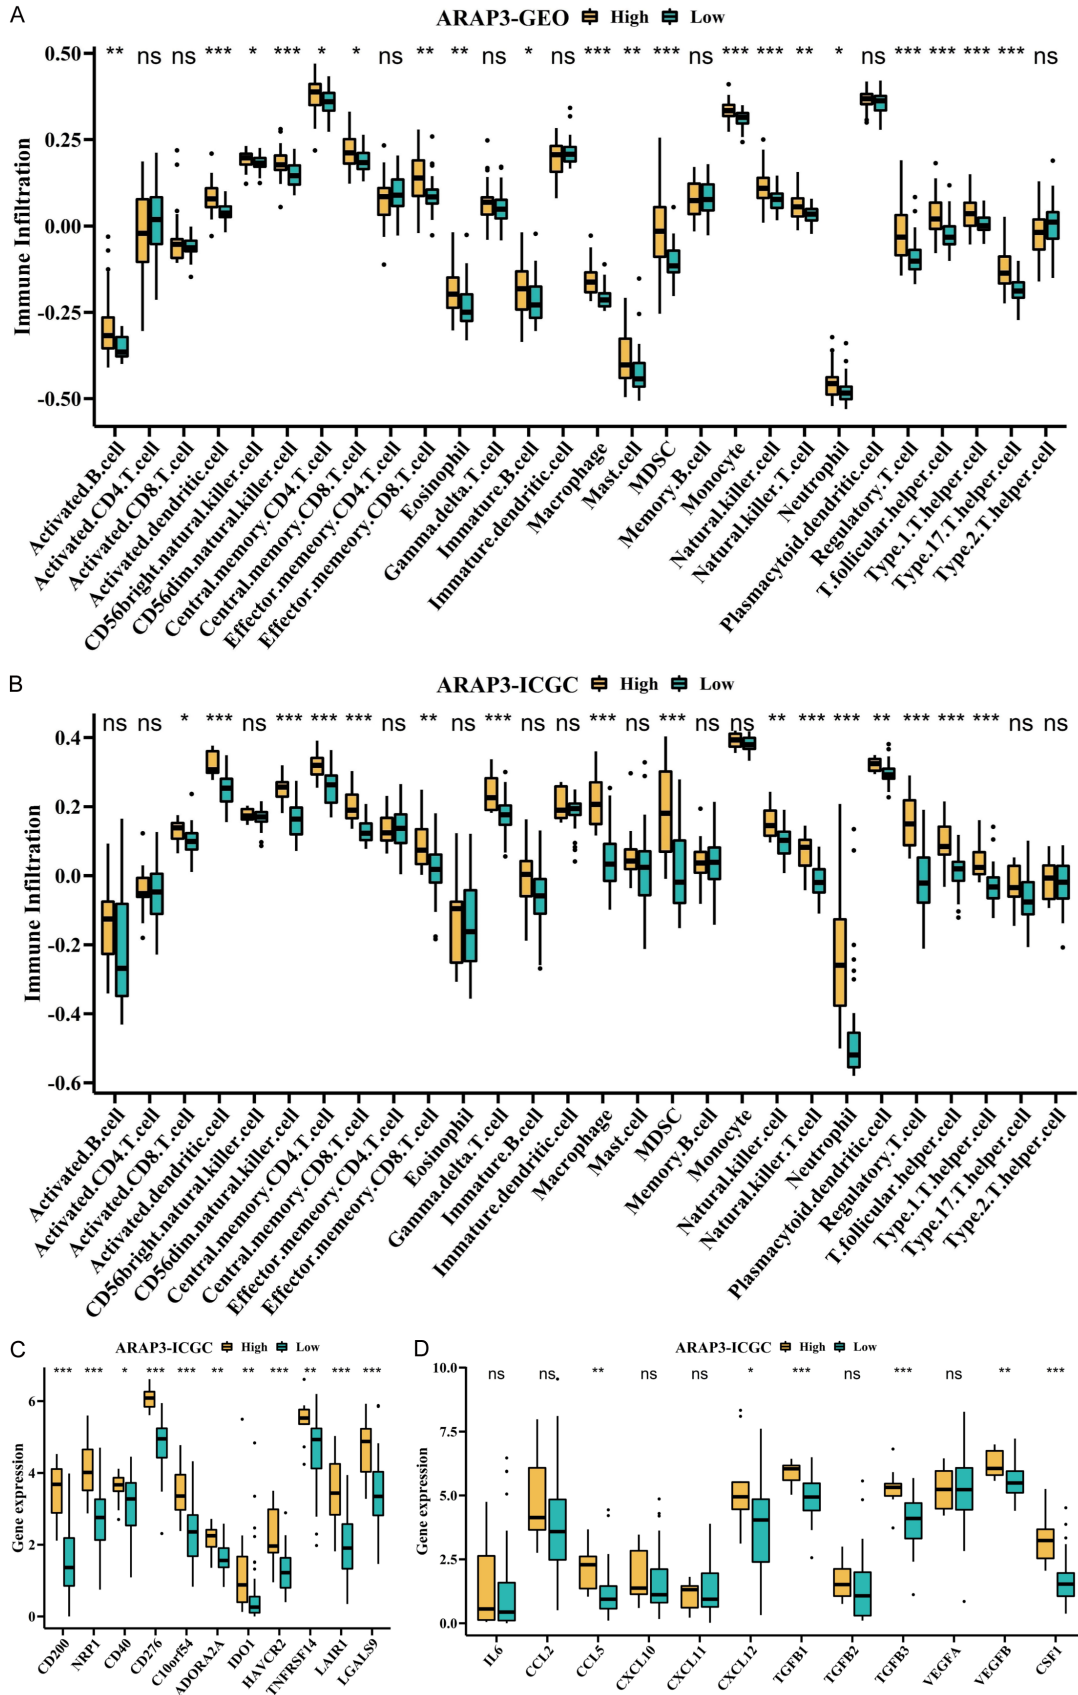

# ARAP3 regulates the tumor microenvironment of Ewing sarcoma

**Figure S7.** Immune cell infiltration analysis of high- and low-expressed ARAP3 groups in both GEO and ICGC cohorts.

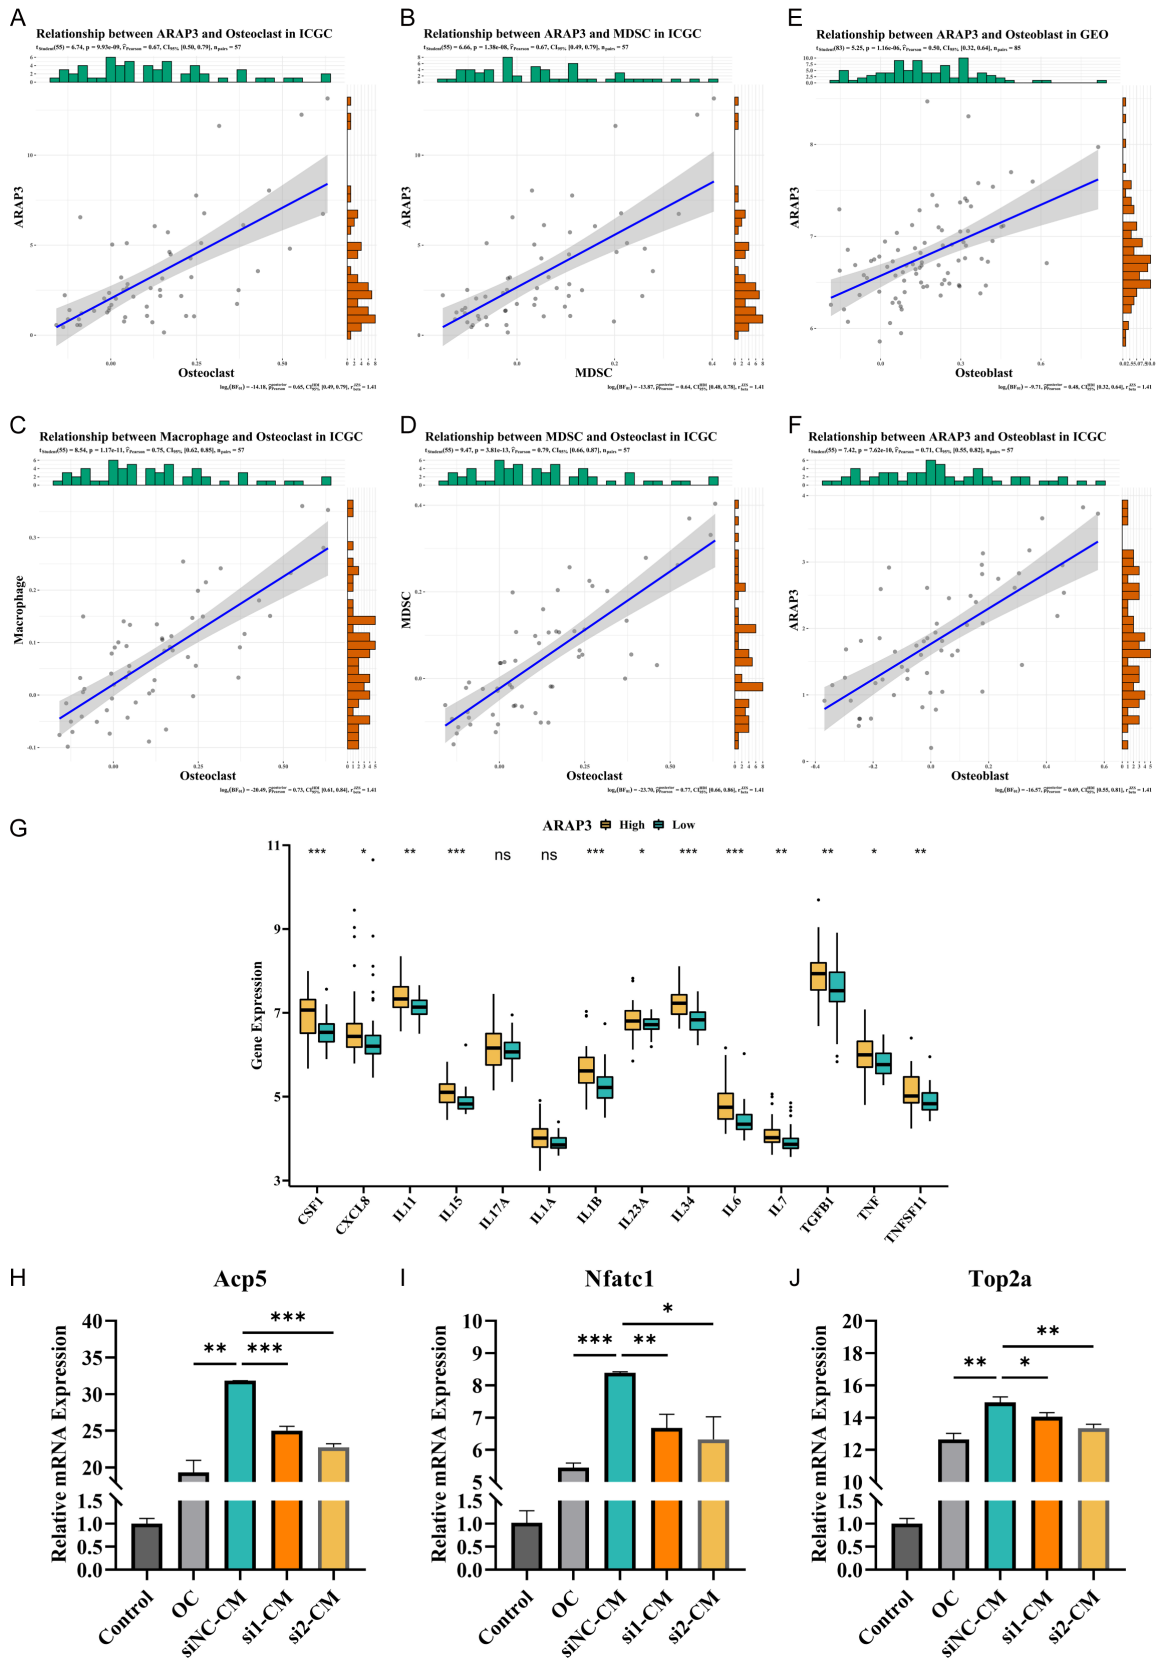

**Figure S8.** Role of ARAP3 in regulation of osteoclast differentiation.
